# Supplementary material for: Virally mediated expression of a biologically active peptide to restrain the nuclear functions of ERK1/2 attenuates learning extinction but not acquisition
Source: Springer Nature journal article supplement (doi:10.1186/s13041-025-01190-1), 2025-03-14
Supplement: MOESM1 [file 13041_2025_1190_MOESM1_ESM.pdf]

## Supplementary material

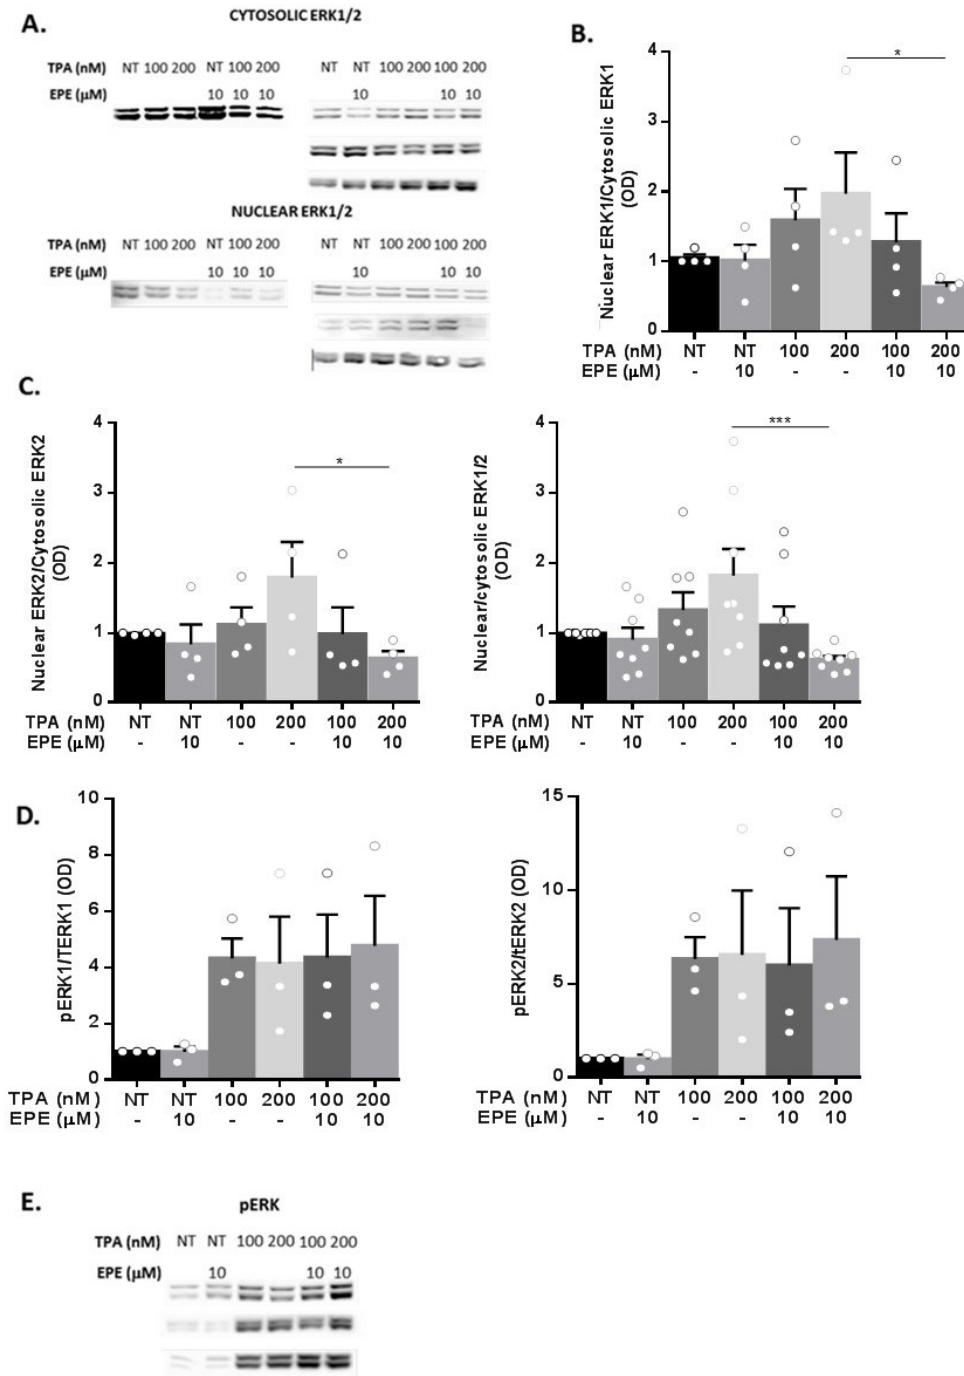

**Figure 2-1. EPE peptide inhibits ERK1/2 nuclear translocation in COS7 cell line.** COS7 cells were pre-treated with EPE (10μM, 2hr) followed by TPA stimulation (100 or 200nM, 15min). Cell lysis and fractionation were done and levels of ERK1/2 in the nucleus and cytosol were evaluated using WB. **A:** Full length uncropped original immunoblots of nuclear and cytosolic ERK1/2 are presented from four different experiments. **B, C:** Nuclear translocation of ERK1/2 is presented as the ratio between nuclear and cytosolic ERK1/2 levels. (Ordinary one-way ANOVA, n=4, ERK1: TPA, 200μM versus TPA, 200μM+EPE p=0.0171; ERK2: TPA, 200μM versus TPA, 200μM+EPE p=0.0157). **D:** The phosphorylation levels of ERK1/2 were analyzed in COS7 cell lysates and presented as pERK levels normalized to tERK levels. Means ± SEM are shown (Ordinary one-way

ANOVA, n=3). (E) Full length uncropped original immunoblots of pERK are shown from 3 different experiments.

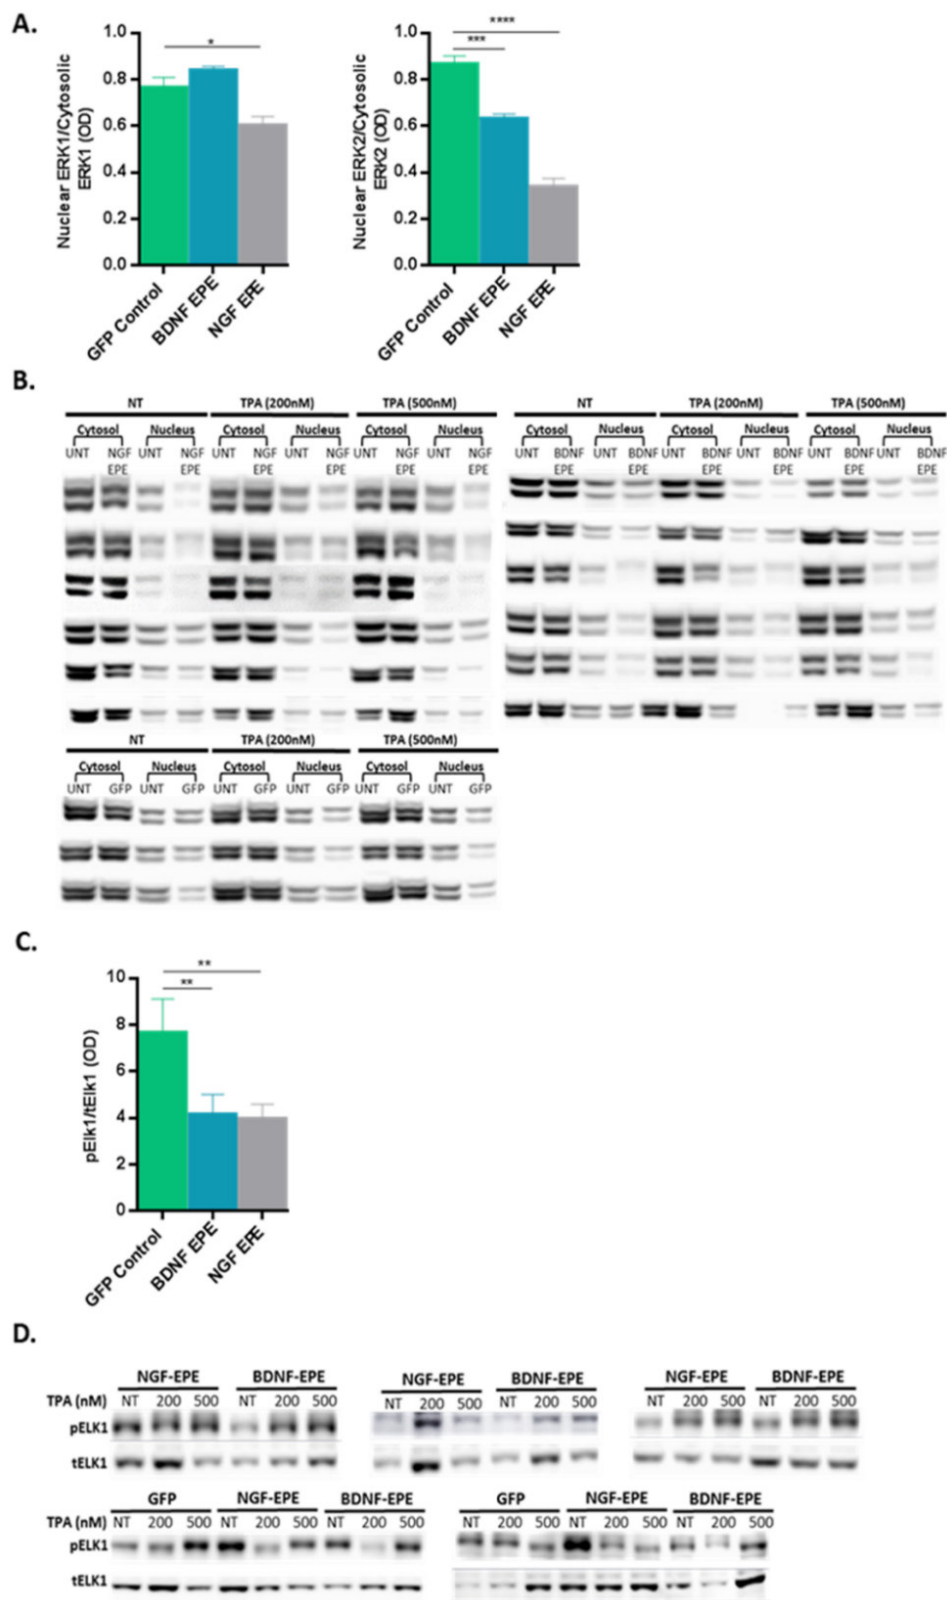

**Figure 3-1: EPE expression, facilitated by neurotrophin pro-domain processing, inhibits ERK nuclear translocation in COS7 cell line.** COS7 cells were transduced with either proBDNF-EPE, proNGF-EPE or GFP

control LVs (MOI 5) and grown in DMEM medium supplemented with 10% FBS. 24hr prior the experiment cells were serum starved (16h, DMEM 1%FBS) and then either stimulated with TPA (500nM, 15min), or left untreated (NT) as control. **A:** Nuclear and cytosolic ERK1/2 protein levels were evaluated by western blot and presented as the ratio between nuclear and cytosolic ERK1/2 levels. Means  $\pm$  SEM are shown (Ordinary one-way ANOVA,  $n \geq 3$ , ERK1: GFP versus BDNF-EPE  $p=0.0256$ ; ERK2: GFP versus BDNF-EPE  $p=0.0009$ , GFP versus NGF-EPE  $p<0.0001$ ). **B:** Full length uncropped original immunoblots of nuclear and cytosolic ERK1/2 are shown from 5 different experiments for proBDNF/NGF-EPE LVs transduction and 3 different experiments for GFP control. **C:** Activation of Elk1 was analyzed in COS7 cells transduced with either proBDNF/NGF-EPE or GFP control LVs and presented as pElk1 normalized to total Elk1 levels. Mean  $\pm$  SEM are shown (Ordinary one-way ANOVA,  $n \geq 3$ , GFP versus BDNF-EPE  $p=0.0036$ , GFP versus NGF-EPE  $p=0.0022$ ). **D:** Full length uncropped original immunoblots of total Elk1 and pElk1 are presented.

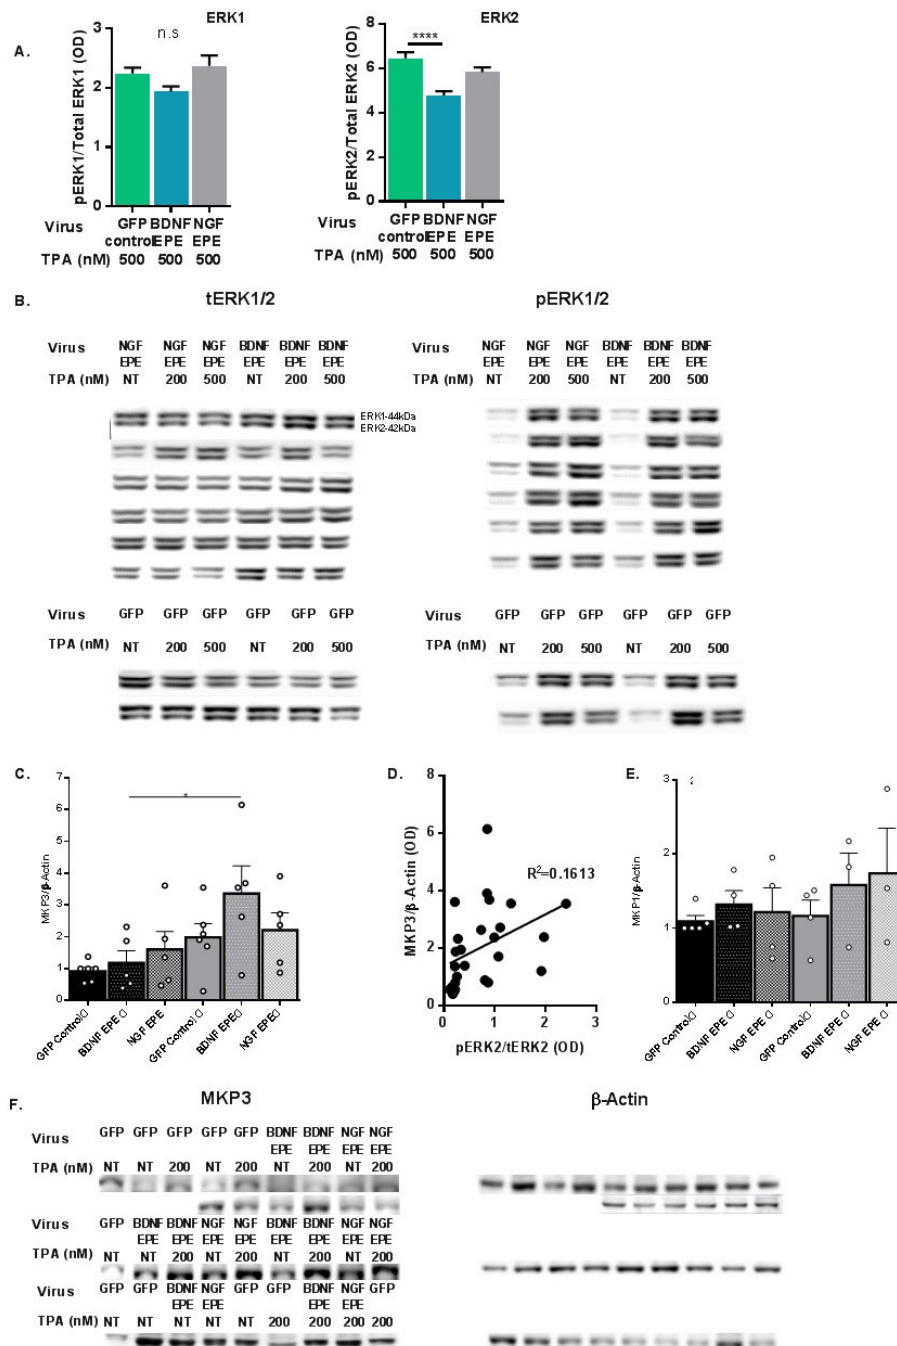

**Figure 3-2: EPE expression, facilitated by neurotrophin pro-domain processing, results in reduced ERK2 phosphorylation in COS7 cells.** **A:** COS7 cells were transduced with either proBDNF-EPE, proNGF-EPE or GFP control LVs (MOI 5) and grown in DMEM medium supplemented with 10% FBS. 24hr prior the experiment cells were serum starved (16h, DMEM 1%FBS) and then either stimulated with TPA (200nM or 500nM, 15min), or left untreated (NT) as control. **A.** ERK1/2 phosphorylation levels are presented as the ratio between pERK1/2 to tERK1/2. Means  $\pm$  SEM are shown (Ordinary one-way ANOVA,  $n \geq 3$ ,  $p < 0.0001$ ). **B:** Full length uncropped original immunoblots of phosphorylated and total ERK1/2 are shown from five different experiments for proBDNF/NGF-EPE and two different experiments for GFP control. **C:** MKP-3 levels are presented as the ratio between MKP-3 and  $\beta$ -Actin. Means  $\pm$  SEM are shown (Ordinary one-way ANOVA,  $n = 3$ ,  $p = 0.0145$ ). **D:** Correlation analysis between MKP-3 and pERK2 levels. (Linear regression of correlation,  $p =$

0.0419). **E:** MKP1 levels are presented as the ratio between MKP1 and  $\beta$ -Actin. Means  $\pm$  SEM are shown (Ordinary one-way ANOVA,  $n=3$ ). **F:** Full length uncropped original immunoblots of MKP-3, and  $\beta$ -Actin are shown from three different experiments.

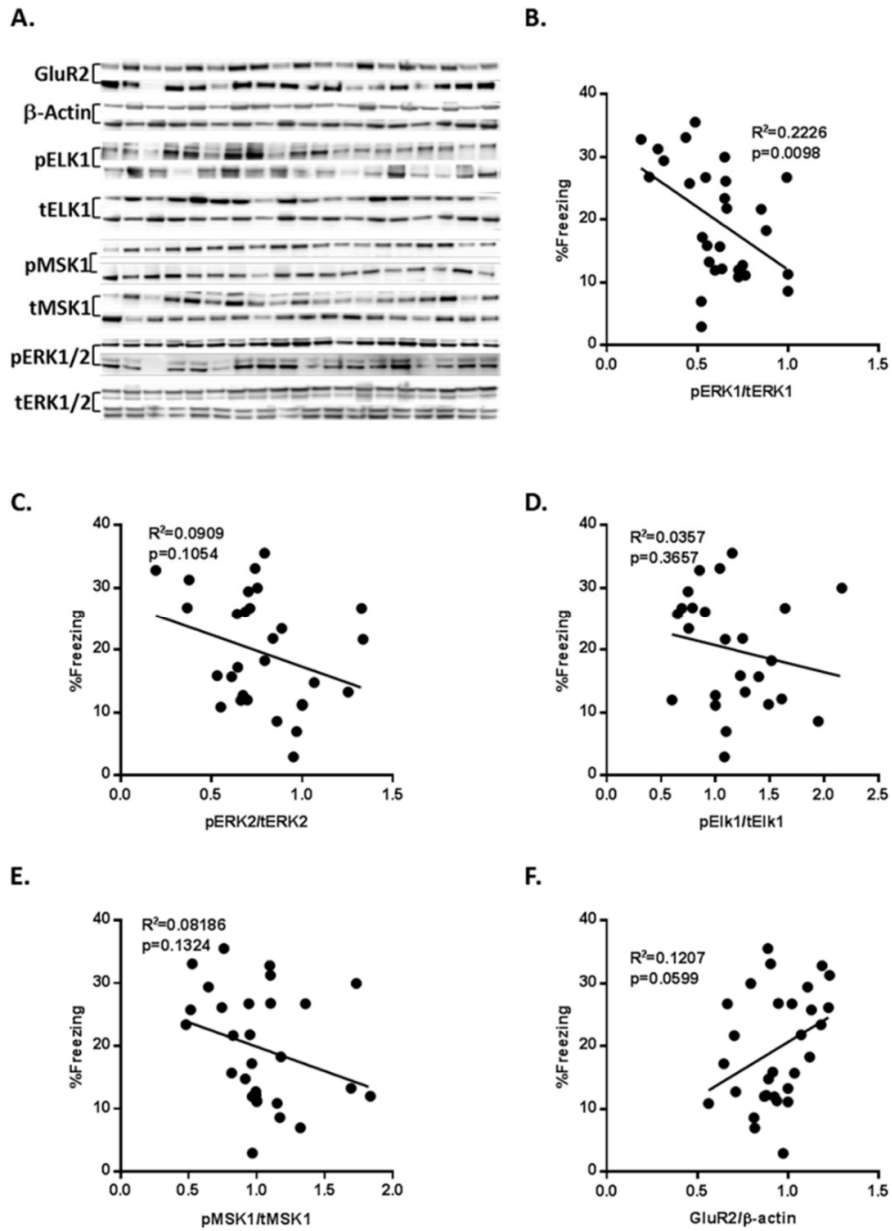

**Figure 5-1: ProBDNF-EPE manipulation inhibits ERK nuclear functions and induces GluR2 expression.** Hippocampal CA1 regions from both hemispheres of the experimental groups (proBDNF-EPE, proNGF-EPE, and GFP control) were processed for western blot analysis. **A:** Full length uncropped original immunoblots of the analyzed proteins are presented. **B-F:** Correlation analysis between freezing percentage and the indicated proteins (Linear regression of correlation,  $n \geq 8$ ).

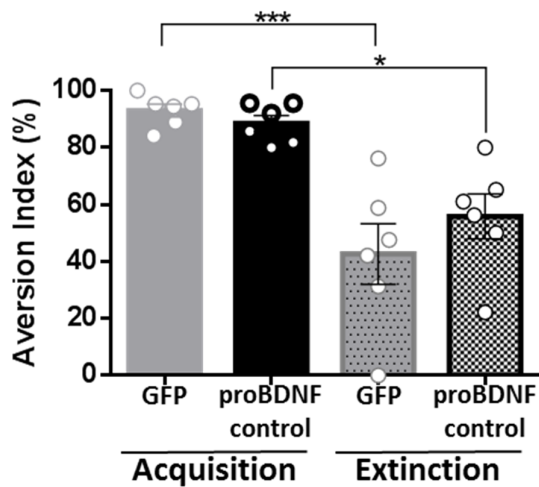

**Figure 6-1: Control peptide expression, facilitated by neurotrophin pro-domain processing, results in normal CTA acquisition and extinction.** Mice injected with the proBDNF-control peptide and GFP LVs display comparable aversion index in both acquisition and extinction trials. The aversion index was defined as [ml water/ (ml water + ml saccharin) x100] consumed. GFP group (n=6), proBDNF-control group (n=6). Data are presented as mean  $\pm$  SEM (One-way ANOVA; GFP: acquisition versus extinction,  $p=0.0002$ , proBDNF control: acquisition versus extinction,  $p=0.0119$ ).

**Table S1. Detailed statistical analysis, related to Figure 2**

| Figure 2 | Biological repetitions | Statistics                                          | Post hoc test (Sidak's multiple comparisons)                                                                    |
|----------|------------------------|-----------------------------------------------------|-----------------------------------------------------------------------------------------------------------------|
| 2B       | 4                      | One-way ANOVA: $F_{(5, 18)} = 1.716$ , $p=0.1820$ . | TPA 200nM Versus TPA 200 nM +10 $\mu$ M EPE: $T_{18} = 2.626$ , $p=0.0171$ .                                    |
| 2C       | 4                      | One-way ANOVA: $F_{(5, 18)} = 1.655$ , $p=0.1965$ . | Sidak's multiple comparisons test: TPA 200nM Versus TPA 200 nM +10 $\mu$ M EPE: $T_{18} = 2.668$ , $p=0.0157$ . |
| 2D       | 8                      | One-way ANOVA: $F_{(5, 42)} = 3.214$ , $p=0.0152$ . | Sidak's multiple comparisons test: TPA 200nM Versus TPA 200 nM +10 $\mu$ M EPE: $T_{42} = 3.705$ , $p=0.0006$ . |

**Table S2. Detailed statistical analysis, related to Figure 3**

| Figure 3 | Biological repetitions               | Statistics                                                | Post hoc test (Sidak's multiple comparisons)                                                                                                                        |
|----------|--------------------------------------|-----------------------------------------------------------|---------------------------------------------------------------------------------------------------------------------------------------------------------------------|
| 3A       | GFP: 3<br>BDNF-EPE: 6<br>NGF- EPE: 6 | One-way ANOVA:<br>$F_{(8, 36)} = 6.871$ ,<br>$p<0.0001$ . | <b>GFP TPA 200nM Versus BDNF-EPE TPA 200 nM:</b> $T_{36} = 3.939$ , $p=0.0014$ .<br><b>GFP TPA 200nM Versus NGF-EPE TPA 200 nM:</b> $T_{36} = 4.249$ , $p=0.0006$ . |

|    |                                      |                                                           |                                                                                                                                                                                                                                                                                                                                                                            |
|----|--------------------------------------|-----------------------------------------------------------|----------------------------------------------------------------------------------------------------------------------------------------------------------------------------------------------------------------------------------------------------------------------------------------------------------------------------------------------------------------------------|
|    |                                      |                                                           | <b>GFP NT Versus BDNF-EPE NT:</b> $T_{36}= 3.035$ , $p=0.0177$ .<br><b>GFP NT Versus NGF-EPE NT:</b> $T_{36}= 3.346$ , $p=0.0077$ .                                                                                                                                                                                                                                        |
| 3B | GFP: 3<br>BDNF-EPE: 6<br>NGF- EPE: 6 | One-way ANOVA:<br>$F_{(5, 20)} = 10.28$ ,<br>$p=0.0007$ . | <b>GFP TPA 200nM Versus BDNF-EPE TPA 200 nM:</b> $T_{36}= 15.69$ , $p<0.0001$ .<br><b>GFP TPA 200nM Versus NGF-EPE TPA 200 nM:</b> $T_{36}= 13.8$ , $p<0.0001$ .<br><b>GFP NT Versus BDNF-EPE NT:</b> $T_{36}= 5.75$ , $p<0.0001$ .<br><b>GFP NT Versus NGF-EPE NT:</b> $T_{36}= 6.363$ , $p<0.0001$ .<br><b>GFP NT Versus GFP TPA 200nM:</b> $T_{36}= 6.157$ , $p<0.0001$ |
| 3D | GFP: 4<br>BDNF-EPE: 5<br>NGF- EPE: 5 | One-way ANOVA:<br>$F_{(5, 22)} = 10.28$ ,<br>$p<0.0001$ . | <b>GFP TPA 200nM Versus BDNF-EPE TPA 200 nM:</b> $T_{22}= 2.929$ , $p=0.0231$ .<br><b>GFP NT Versus GFP TPA 200nM:</b> $T_{22}= 5.194$ , $p<0.0001$ .                                                                                                                                                                                                                      |
| 3F | GFP: 3<br>BDNF-EPE: 6<br>NGF- EPE: 6 | One-way ANOVA:<br>$F_{(5, 24)} = 26.62$ ,<br>$p<0.0001$ . | <b>GFP TPA 200nM Versus BDNF-EPE TPA 200 nM:</b> $T_{24}= 2.95$ , $p=0.0208$ .<br><b>GFP TPA 200nM Versus NGF-EPE TPA 200 nM:</b> $T_{24}= 1.72$ , n.s.<br><b>GFP NT Versus GFP TPA 200nM:</b> $T_{24}= 6.473$ , $p<0.0001$ .                                                                                                                                              |
| 3G | GFP: 3<br>BDNF-EPE: 6<br>NGF- EPE: 6 | One-way ANOVA:<br>$F_{(5, 24)} = 221.1$ ,<br>$p<0.0001$ . | <b>GFP TPA 200nM Versus BDNF-EPE TPA 200 nM:</b> $T_{24}= 10.87$ , $p<0.0001$ .<br><b>GFP TPA 200nM Versus NGF-EPE TPA 200 nM:</b> $T_{24}= 8.64$ , $p<0.0001$<br><b>GFP NT Versus GFP TPA 200nM:</b> $T_{24}= 20.79$ , $p<0.0001$ .                                                                                                                                       |

**Table S3. Detailed statistical analysis, related to Figure 4**

| Figure 4 | Biological Repetitions                                | Statistics and Post hoc test                                                                                                                                                                                                                                                               |
|----------|-------------------------------------------------------|--------------------------------------------------------------------------------------------------------------------------------------------------------------------------------------------------------------------------------------------------------------------------------------------|
| 4B       | GFP: 10 mice<br>BDNF-EPE: 9 mice<br>NGF- EPE: 11 mice | Two-way ANOVA $F_{(3, 81)} = 76.24$ , $p<0.0001$ ; Dunnett's multiple comparisons tests:<br><u><b>BDNF-EPE</b></u><br>0-120s Versus 240-300s: $p<0.0001$<br><u><b>NGF-EPE</b></u><br>0-120s Versus 240-300s: $p<0.0001$<br><u><b>GFP Control</b></u><br>0-120s Versus 240-300s: $p<0.0001$ |

|    |                                                                      |                                                                                                                                                                                                                                                                                                                                                                                                                                                                                                                                                                                                                                                                                                                                                                                                                                                                                                                                                                                         |
|----|----------------------------------------------------------------------|-----------------------------------------------------------------------------------------------------------------------------------------------------------------------------------------------------------------------------------------------------------------------------------------------------------------------------------------------------------------------------------------------------------------------------------------------------------------------------------------------------------------------------------------------------------------------------------------------------------------------------------------------------------------------------------------------------------------------------------------------------------------------------------------------------------------------------------------------------------------------------------------------------------------------------------------------------------------------------------------|
| 4C | <p>GFP: 10 mice</p> <p>BDNF-EPE: 9 mice</p> <p>NGF- EPE: 11 mice</p> | <p>Two-way ANOVA <math>F_{(10, 135)} = 1.891</math>, <math>p=0.0514</math>; Tukey's multiple comparisons tests:</p> <p><u>Extinction Day 1</u></p> <p><b>GFP control Versus BDNF-EPE:</b> <math>p=0.0003</math></p> <p><b>NGF-EPE Versus BDNF-EPE:</b> <math>p=0.0002</math></p> <p><u>Extinction Day 2</u></p> <p><b>GFP control Versus BDNF-EPE:</b> <math>p&lt;0.0001</math></p> <p><b>NGF-EPE Versus BDNF-EPE:</b> <math>p=0.0006</math></p> <p><u>Extinction Day 3</u></p> <p><b>GFP control Versus BDNF-EPE:</b> <math>p&lt;0.0001</math></p> <p><b>NGF-EPE Versus BDNF-EPE:</b> <math>p&lt;0.0001</math></p> <p><u>Extinction Day 4</u></p> <p><b>GFP control Versus BDNF-EPE:</b> <math>p=0.0012</math></p> <p><b>NGF-EPE Versus BDNF-EPE:</b> <math>p=0.0015</math></p> <p><u>Extinction Day 5</u></p> <p><b>GFP control Versus BDNF-EPE:</b> <math>p&lt;0.0001</math></p> <p><b>NGF-EPE Versus BDNF-EPE:</b> <math>p=0.0056</math></p>                                        |
| 4C | <p>GFP: 10 mice</p> <p>BDNF-EPE: 9 mice</p> <p>NGF- EPE: 11 mice</p> | <p>Two-way ANOVA <math>F_{(5, 135)} = 48.42</math>, <math>P&lt;0.0001</math>; Dunnett's multiple comparisons test:</p> <p><b><u>BDNF-EPE</u></b></p> <p>Memory test versus extinction day 1: <math>p=0.9998</math></p> <p>Memory test versus extinction day 2: <math>p=0.3479</math></p> <p>Memory test versus extinction day 3: <math>p=0.1051</math></p> <p>Memory test versus extinction day 4: <math>p&lt;0.0001</math></p> <p>Memory test versus extinction day 5: <math>p&lt;0.0001</math></p> <p><b><u>NGF-EPE</u></b></p> <p>Memory test versus extinction day 1: <math>p=0.1506</math></p> <p>Memory test versus extinction day 2: <math>p=0.0021</math></p> <p>Memory test versus extinction day 3: <math>p&lt;0.0001</math></p> <p>Memory test versus extinction day 4: <math>p&lt;0.0001</math></p> <p>Memory test versus extinction day 5: <math>p&lt;0.0001</math></p> <p><b><u>GFP Control</u></b></p> <p>Memory test versus extinction day 1: <math>p=0.0443</math></p> |



|  |  |                                                                                                                                                                                                          |
|--|--|----------------------------------------------------------------------------------------------------------------------------------------------------------------------------------------------------------|
|  |  | Memory test versus extinction day 2: $p<0.0001$<br>Memory test versus extinction day 3: $p<0.0001$<br>Memory test versus extinction day 4: $p<0.0001$<br>Memory test versus extinction day 5: $p<0.0001$ |
|--|--|----------------------------------------------------------------------------------------------------------------------------------------------------------------------------------------------------------|

**Table S4. Detailed statistical analysis, related to Figure 5**

| <b>Figure 5</b> | <b>Biological Repetitions</b>                         | <b>Statistics</b>                                                                | <b>Post hoc test (Dunnett's multiple comparisons test)</b>                                      |
|-----------------|-------------------------------------------------------|----------------------------------------------------------------------------------|-------------------------------------------------------------------------------------------------|
| 5A              | GFP: 10 mice<br>BDNF-EPE: 9 mice<br>NGF- EPE: 11 mice | One-way ANOVA: model (all groups together):<br>$F_{(2, 27)} = 9.487, p=0.0008$ . | <b>GFP Control versus BDNF-EPE:</b> $p=0.0010$<br><b>GFP Control versus NGF-EPE:</b> $p=0.9179$ |
| 5B              | GFP: 10 mice<br>BDNF-EPE: 9 mice<br>NGF- EPE: 11 mice | One-way ANOVA: model (all groups together):<br>$F_{(2, 27)} = 5.436, p=0.0104$ . | <b>GFP Control versus BDNF-EPE:</b> $p=0.0273$<br><b>GFP Control versus NGF-EPE:</b> $p=0.8635$ |
| 5C              | GFP: 10 mice<br>BDNF-EPE: 9 mice<br>NGF- EPE: 11 mice | One-way ANOVA: model (all groups together):<br>$F_{(2, 27)} = 3.68, p=0.0386$ .  | <b>GFP Control versus BDNF-EPE:</b> $p=0.0261$<br><b>GFP Control versus NGF-EPE:</b> $p=0.6964$ |
| 5D              | GFP: 10 mice<br>BDNF-EPE: 9 mice<br>NGF- EPE: 11 mice | One-way ANOVA: model (all groups together):<br>$F_{(2, 27)} = 5.554, p=0.0095$ . | <b>GFP Control versus BDNF-EPE:</b> $p=0.0394$<br><b>GFP Control versus NGF-EPE:</b> $p=0.6770$ |
| 5E              | GFP: 10 mice<br>BDNF-EPE: 9 mice<br>NGF- EPE: 11 mice | One-way ANOVA: model (all groups together):<br>$F_{(2, 27)} = 6.524, p=0.0049$ . | <b>GFP Control versus BDNF-EPE:</b> $p=0.0131$<br><b>GFP Control versus NGF-EPE:</b> $p=0.8979$ |

**Table S5. Detailed statistical analysis, related to Figure 6**

| <b>Figure 6</b> | <b>Number of mice</b>   | <b>Statistics</b>                                                                | <b>Post hoc test (Tukey's multiple comparisons test)</b>                                                                                                                                |
|-----------------|-------------------------|----------------------------------------------------------------------------------|-----------------------------------------------------------------------------------------------------------------------------------------------------------------------------------------|
| 6B              | GFP: 19<br>BDNF-EPE: 16 | Mixed-effects analysis<br>Time X Treatment:<br>$F_{(14, 274)} = 5.043, p<0.0001$ | <u>Extinction Day 1</u><br><b>GFP controls Versus BDNF-EPE:</b> $p=0.9940$ .<br><u>Extinction Day 2</u><br><b>GFP controls Versus BDNF-EPE:</b> $p=0.9711$ .<br><u>Extinction Day 3</u> |

|  |  |  |                                                                                                                                                                                                                                                                                                                                                                                                                                                                                                                                                                |
|--|--|--|----------------------------------------------------------------------------------------------------------------------------------------------------------------------------------------------------------------------------------------------------------------------------------------------------------------------------------------------------------------------------------------------------------------------------------------------------------------------------------------------------------------------------------------------------------------|
|  |  |  | <p><b>GFP control Versus BDNF-EPE:</b> <math>p=0.2094</math>.</p> <p><u>Extinction Day 4</u></p> <p><b>GFP control Versus BDNF-EPE:</b> <math>p=0.0655</math>.</p> <p><u>Extinction Day 5</u></p> <p><b>GFP control Versus BDNF-EPE:</b> <math>p&lt;0.0001</math>.</p> <p><u>Extinction Day 6</u></p> <p><b>GFP control Versus BDNF-EPE:</b> <math>p=0.6592</math>.</p> <p><u>Extinction Day 7</u></p> <p><b>GFP control Versus BDNF-EPE:</b> <math>p&lt;0.0001</math>.</p> <p><u>RI</u></p> <p><b>GFP control Versus BDNF-EPE:</b> <math>p=0.7991</math>.</p> |
|--|--|--|----------------------------------------------------------------------------------------------------------------------------------------------------------------------------------------------------------------------------------------------------------------------------------------------------------------------------------------------------------------------------------------------------------------------------------------------------------------------------------------------------------------------------------------------------------------|
